1 **Single-cell transcriptomics reveals multiple neuronal cell types**  
2 **in human midbrain-specific organoids**

3

4 Lisa M. Smits<sup>1</sup>, Stefano Magni<sup>1</sup>, Kamil Grzyb<sup>1</sup>, Paul MA. Antony<sup>1</sup>, Rejko Krüger<sup>1</sup>,  
5 Alexander Skupin<sup>1,2</sup>, Silvia Bolognin<sup>1</sup> and Jens C. Schwamborn<sup>1</sup>

6 <sup>1</sup>Luxembourg Centre for Systems Biomedicine (LCSB), University of Luxembourg,  
7 Belvaux Luxembourg

8 <sup>2</sup>University California San Diego, La Jolla, CA, USA

9

10 **Corresponding author**

11

12 Prof. Dr. Jens C. Schwamborn  
13 [jens.schwamborn@uni.lu](mailto:jens.schwamborn@uni.lu)

14

15 **Keywords: neural stem cells, midbrain organoids, neuronal subtypes, single-cell**  
16 **RNA-sequencing, electrophysiological activity**

17

18

19 **Abstract**

20 Human stem cell-derived organoids have great potential for modelling physiological and  
21 pathological processes. They recapitulate *in vitro* the organisation and function of a respective  
22 organ or part of an organ. Human midbrain organoids (hMOs) have been described to contain  
23 midbrain-specific dopaminergic neurons that release the neurotransmitter dopamine.  
24 However, the human midbrain contains also additional neuronal cell types, which are  
25 functionally interacting with each other. Here, we analysed hMOs at high-resolution by means  
26 of single-cell RNA-sequencing (scRNA-seq), imaging and electrophysiology to unravel cell  
27 heterogeneity. Our findings demonstrate that hMOs show essential neuronal functional  
28 properties as spontaneous electrophysiological activity of different neuronal subtypes,  
29 including dopaminergic, GABAergic, and glutamatergic neurons. Recapitulating these *in vivo*  
30 features makes hMOs an excellent tool for *in vitro* disease phenotyping and drug discovery.

31

32 **Introduction**

33 Current *in vitro* approaches to model physiology and pathology of human neurons are mainly  
34 based on pure cultures of neurons grown under 2D conditions. It has been shown that the  
35 differentiation potential of human induced pluripotent stem cells (iPSCs) provides a unique  
36 source of different neural cell types (Takahashi and Yamanaka, 2006). Until now, many  
37 protocols for generating iPSC-derived neural cultures have been described. The resulting cell  
38 culture monolayers have been proven as useful tools to study disease mechanisms and to  
39 identify potential neuroprotective compounds (Nguyen et al., 2011; Cooper et al., 2012;  
40 Sánchez-Danés et al., 2012; Reinhardt et al., 2013b; Ryan et al., 2013). However, these  
41 culture conditions does not recapitulate several characteristics, which are relevant to the  
42 human brain, like cyto-architecture or complex cell-cell interactions. This may result in  
43 inaccurate modelling of the human brain (patho-)physiology with the consequence that

44 candidate compounds might prove efficacy in 2D *in vitro* studies but are ineffective in clinical  
45 trials or vice versa (Abe-Fukasawa et al., 2018). The recent establishment of new 3D neuronal  
46 cell culture models has contributed to mimic key aspects of human brain development  
47 (Lancaster et al., 2013; Tieng et al., 2014; Muguruma et al., 2015; Jo et al., 2016; Qian et al.,  
48 2016; Monzel et al., 2017). Studies using human cerebral brain organoids have shown the  
49 acquisition of neuronal maturity and network activity (Quadrato et al., 2017; Matsui et al.,  
50 2018). Their complex, multicellular architecture enables the study of neuronal diseases and  
51 has already led to novel insights on e.g. Zika virus-induced microcephaly (Ming et al., 2016;  
52 Qian et al., 2017). Besides this unique *in vitro* disease modelling potential, human brain  
53 organoids provide a platform for advanced drug screening (Kelava and Lancaster, 2016; Di  
54 Lullo and Kriegstein, 2017). In this study, we focused on a detailed characterisation of the  
55 different neuronal subtypes in human midbrain-specific organoids (hMOs). With single-cell  
56 transcriptome analysis, we examined the presence of different neuronal subtypes, and  
57 subsequently studied the effect of chemical compounds on the electrophysiological activity of  
58 the neuronal network. Our findings demonstrate that hMOs contain, beside dopaminergic  
59 neurons, other neuronal subtypes including GABAergic, glutamatergic, and serotonergic  
60 neurons. hMOs showed essential neuronal functional properties during the course of  
61 differentiation, like synapse formation and spontaneous electrophysiological activity. These  
62 features indicate that hMOs recapitulate specific characteristics of functional human midbrain  
63 tissue, thus making them a valuable resource for *in vitro* disease modelling and drug  
64 discovery.

65

## 66 **Material and Methods**

67

## 68 **Ethics Statement**

69 Written informed consent was obtained from all individuals who donated samples to this  
70 study and the here conducted work was approved by the responsible ethics commissions. The  
71 cell lines used in this study are summarised in Table 1.

72

## 73 **Pluripotent Stem Cell culture**

74 hiPSC lines were provided by Bill Skarnes, Wellcome Trust Sanger Institute (iPSC Bill),  
75 Alstem (iPS15, derived from human peripheral blood mononuclear cells, episomal  
76 reprogrammed) or previously described in Reinhard *et alia* (Reinhardt et al., 2013b). The cells  
77 were cultured on Matrigel-coated (Corning, hESC-qualified matrix) plates, maintained in  
78 Essential 8 medium (Thermo Fisher Scientific) and cultured with and split 1:6 to 1:8 every  
79 four to five days using Accutase (Sigma). 10  $\mu$ M ROCK inhibitor (Y-27632, Abcam) was  
80 added to the media for 24 h following splitting.

81

## 82 **Derivation of midbrain floorplate neural progenitor cells**

83 The derivation and maintenance of midbrain floorplate neural progenitor cells (mfNPCs), has  
84 been described previously (Smits et al., 2019).

85 In brief, embryoid bodies (EBs) were formed with 2,000 iPSCs each, using AggreWell 400  
86 (Stemcell Technologies). The cells were cultured in Knockout DMEM (Invitrogen) with 20 %  
87 Knockout Serum Replacement (Invitrogen), 100  $\mu$ M beta-mercaptoethanol (Gibco), 1 %  
88 nonessential amino acids (NEAA, Invitrogen), 1 % penicillin/streptomycin/glutamine  
89 (Invitrogen), freshly supplemented with 10  $\mu$ M SB-431542 (SB, Ascent Scientific), 250 nM  
90 LDN-193189 (LDN, Sigma), 3  $\mu$ M CHIR99021 (CHIR, Axon Medchem), 0.5  $\mu$ M SAG  
91 (Merck), and 5  $\mu$ M ROCK inhibitor (Sigma). After 24 h, EBs were transferred to a non-

92 treated tissue culture plate (Corning). On day two, medium was replaced with N2B27 medium  
93 consists of DMEM-F12 (Invitrogen)/Neurobasal (Invitrogen) 50:50 with 1:200 N2  
94 supplement (Invitrogen), 1:100 B27 supplement lacking vitamin A (Invitrogen) with 1 %  
95 penicillin/streptomycin/glutamine, supplemented with 10  $\mu$ M SB, 250 nM LDN, 3  $\mu$ M CHIR,  
96 0.5  $\mu$ M SAG. On day four and six, medium was exchanged with the same but including  
97 200  $\mu$ M ascorbic acid (AA, Sigma). On day eight, EBs with neuroepithelial outgrowth were  
98 triturated into smaller pieces and diluted in a 1:10 ratio. For following passages, 1x TrypLE  
99 Select Enzyme (Gibco)/0.5mM EDTA (Invitrogen) in 1x PBS was used and 10,000 to 20,000  
100 cells per 96-well ultra-low attachment plate (round bottom, Corning) were seeded. The cells  
101 were always kept under 3D culture conditions and from passage 1 on cultured in N2B27  
102 medium freshly supplemented with 2.5  $\mu$ M SB, 100 nM LDN, 3  $\mu$ M CHIR, 200  $\mu$ M AA, and  
103 0.5  $\mu$ M SAG. After every cell split the ultra-low attachment plate was centrifuged for 3 min at  
104 200 xg to assure the aggregation of single cells at the bottom of the well. Additionally, 5  $\mu$ M  
105 ROCK inhibitor was added. The cells were split every 7 to 14 days and the medium was  
106 changed every third day. After four to five passages, mfNPCs were used as a starting  
107 population for hMOs.

108

### 109 **Generation of midbrain-specific organoids**

110 To start the generation of hMOs, 3,000 cells per well were seeded to an ultra-low attachment  
111 96-well round bottom plate, centrifuged for 3 min at 200 xg and kept under maintenance  
112 conditions for seven days. LDN and SB were withdrawn of mfNPC expansion medium and  
113 after three additional days, the concentration of CHIR was reduced to 0.7  $\mu$ M. On day nine of  
114 differentiation, medium was changed to neuronal maturation N2B27 medium including  
115 10 ng/ml BDNF (Peprotech), 10 ng/ml GDNF (Peprotech), 200  $\mu$ M AA (Sigma), 500  $\mu$ M  
116 dbcAMP (Sigma), 1 ng/ml TGF- $\beta$ 3 (Peprotech), 2.5 ng/ml ActivinA (Life Technologies) and  
117 10  $\mu$ M DAPT (Cayman). The organoids were kept under static culture conditions with media

118 changes every third day for 35 or 70 days. Detailed information about the generation of hMOs  
119 has been published recently (Smits et al., 2019).

120

### 121 **Immunofluorescence**

122 hMOs were fixed with 4 % PFA overnight at 4 °C and washed 3x with PBS for 15 min. After  
123 treatment, they were embedded in 3-4 % low-melting point agarose in PBS. The solid agarose  
124 block was sectioned with a vibratome (Leica VT1000s) into 50 µm sections. The sections  
125 were blocked on a shaker with 0.5 % Triton X-100, 0.1 % sodium azide, 0.1 % sodium citrate,  
126 2 % BSA and 5 % normal goat or donkey serum in PBS for 90 min at RT. Primary antibodies  
127 were diluted in the same solution but with only 0.1 % Triton X-100 and were applied for 48 h  
128 at 4 °C.

129 After incubation with the primary antibodies (Table 2), sections were washed 3x with PBS  
130 and subsequently blocked for 30 min at RT on a shaker. Then sections were incubated with  
131 the secondary antibodies in 0.05 % Tween-20 in PBS for two hours at RT and washed with  
132 0.05 % Tween-20 in PBS and Milli-Q water before they were mounted in Fluoromount-G  
133 mounting medium (Southern Biotech).

134 STAINperfect Immunostaining Kit (ImmuSmol) was used according to manufacturer's  
135 protocol to detect dopamine, serotonin, GABA and L-glutamine. Nuclei were counterstained  
136 with Hoechst 33342 (Invitrogen).

137 For qualitative analysis, three randomly selected fields per organoid section were acquired  
138 with a confocal laser scanning microscope (Zeiss LSM 710) and images were further  
139 processed with OMERO Software. Three-dimensional surface reconstructions of confocal z-  
140 stacks were created using Imaris software (Bitplane).

141

### 142 **Quantitative Image analysis**

143 Immunofluorescence 3D images of hMOs were analysed in Matlab (Version 2017b,

144 Mathworks). The in-house developed image analysis algorithms automate the segmentation of  
145 nuclei, astrocytes and neurons with structure-specific feature extraction. The image  
146 preprocessing for the segmentation of nuclei was computed by convolving the raw Hoechst  
147 channel with a gaussian filter. By selecting a pixel threshold to identify apoptotic cells, a  
148 pyknotic nuclei mask was identified and subtracted from the nuclei mask.

149 For the segmentation of neurons, a median filter was applied to the raw TUJ1 channels. The  
150 expression levels were expressed in two ways: i) positive pixel of the marker, normalised by  
151 the pixel count of Hoechst; ii) cells positive for a marker expressed as a percentage of the total  
152 number of cells. In this latter case, the nuclei were segmented and a watershed function was  
153 applied. Considering the high cell density of the specimens, steps to ensure high quality in the  
154 segmentation process were implemented and structure with a size higher than 10,000 pixels  
155 were removed (this indicated uncorrected segmentation e.g. clumps). In the nuclei successfully  
156 segmented as a single element, a perinuclear zone was identified. In case the marker of  
157 interest was positive in at least 1 % of the perinuclear area, the corresponding cell was  
158 considered as positive.

159

#### 160 **Single-cell RNA-sequencing using Droplet-Sequencing (Drop-Seq)**

161 scRNA-seq data were generated using the Droplet-Sequencing (Drop-Seq) technique  
162 (Macosko et al., 2015) as described previously (Walter, 2019). In this work, we performed  
163 scRNA-seq of hMOs derived from hiPSC line H4 (see Table 1). For each time point, 35 d and  
164 70 d after dopaminergic differentiation, we pooled and analysed 30 hMOs each.

165

#### 166 **Pre-processing of the digital expression matrices from scRNA-seq**

167 The result of the Drop-Seq scRNA-seq pipeline and subsequent bioinformatics processing is a  
168 digital expression matrix (DEM) representing the number of mRNA molecules captured per  
169 gene per droplet. Here, we obtained two DEMs, one corresponding to 35 d hMOs and the

170 other to 70 d hMOs. After quality cut based on knee plots, we retained for each sample 500  
171 cells with the highest number of total transcripts measured and performed normalisation of  
172 the DEM separately. Finally, the two DEMs were merged for the comparison analysis of the  
173 two time points based on 24,976 expressed genes in 1,000 cells. The data was analysed by our  
174 customized Python analysis pipeline (version 3.6.0, with anaconda version 4.3.1) including  
175 dimensionality reduction by t-distributed stochastic neighbourhood embedding (t-SNE) (van  
176 der Maarten and Hinton 2008) and differentially gene expression analysis.

177

### 178 **Analysis of DEGs from scRNA-seq data**

179 To determine, which and how many genes were differentially expressed between 35 d and  
180 70 d hMOs, we applied one-way ANOVA test, a one-way ANOVA test on ranks (Kruskal-  
181 Wallis test), and a Mutual Information based test. The minimum p-value obtained for each  
182 gene across these three tests was retained and statistical significance was set to  $p < 0.01$  after  
183 Bonferroni correction for differentially expressed genes (DEG).

184

### 185 **Cumulative gene expressions from scRNA-seq data**

186 From literature, we extracted cell-type specific gene lists (Table 3) for stem cells, neurons,  
187 and neuronal subtypes (dopaminergic, glutamatergic, GABAergic and serotonergic neurons)  
188 (Reinhardt et al., 2013a; La Manno et al., 2016; Cho et al., 2017). Note, that not all genes  
189 listed therein have been measured in our dataset, these were highlighted in Table 3.

190 For each list we defined a score, which we refer to as cumulative gene expression, computed  
191 as the sum of the corresponding genes from normalized DEM for each cell. Since the  
192 expression levels were measured at single cell level, we can consider the cells distributions  
193 across the cumulative genes expression scores (Figure 1D and Figure 2A). These histograms  
194 exhibit the cumulative gene expression scores normalised to their maxima on the horizontal  
195 axis. Thus, on the horizontal axis, a value of 1 corresponds to the maximal cumulative gene



196 expression for one list of genes, while 0 corresponds to no expression of any genes from that  
197 list. The vertical axis exhibits the number of cells falling into the corresponding bin of the  
198 histogram. In each subpanel the distributions for day 35 and for day 70 are shown. Population  
199 differences were assessed by Z-test of the means with Bonferroni correction.

200

### 201 **Gene-gene correlations from scRNA-seq data**

202 From the scRNA-seq data we also computed gene-gene Pearson correlation coefficients for  
203 stemness- and neuron-specific genes. Analysis was performed independently for the two  
204 samples (35d DA dif and 70d DA dif) resulting in two correlation matrices (Figure 1E).

205 In the lower triangular matrix all correlation values are shown, whereas the upper triangular  
206 matrix only statistical significant correlations ( $p$ -value  $< 0.05$  after Bonferroni correction). For  
207 visual clarity, diagonal elements and not detected genes were excluded.

208

### 209 **Fold changes of gene expression from scRNA-seq data**

210 For individual genes, we considered the normalized gene expression across the cell  
211 populations. For each selected gene, we compared its expression within the 35 d cells with the  
212 one within the 70 d cells by computing the logarithmic fold change ( $\log_2FC$ ). We performed  
213 this analysis for the neuron specific genes (Figure 1F) and neuronal subtypes including  
214 glutamatergic neurons, GABAergic neurons, and dopaminergic neurons (Figure 2B-D) where  
215 negative values indicate that a gene is less expressed at day 35 than at day 70 and positive  
216 numbers the opposite.  $p$ -value are based on Z-test with Bonferroni correction and significance  
217 levels correspond to \* =  $p$ -value  $< 0.05$ , \*\* =  $p$ -value  $< 0.01$ , \*\*\* =  $p$ -value  $< 0.001$ , \*\*\*\* =  
218  $p$ -value  $< 0.0001$ . Error bars represent SEM based on the individual sample average and error  
219 propagation.

220

### 221 **TEM Morphology**

222 63 day old hMO specimens were immersion-fixed in a solution of 2 % PFA and 2.5 %  
223 glutaraldehyde in 0.1 M sodium cacodylate buffer (pH 7.4, Electron Microscopy Sciences,  
224 Hatfield, PA) for 3 h, rinsed several times in cacodylate buffer and further post-fixed in 2 %  
225 glutaraldehyde in 0.1 M sodium cacodylate buffer for 2 h at room temperature on a gentle  
226 rotator; fixative was allowed to infiltrate an additional 48 h at 4 °C. Specimens were rinsed  
227 several times in cacodylate buffer, post-fixed in 1.0 % osmium tetroxide for 1 h at room  
228 temperature and rinsed several times in cacodylate buffer. Samples were then dehydrated  
229 through a graded series of ethanols to 100 % and dehydrated briefly in 100 % propylene  
230 oxide. Tissue was then allowed to pre-infiltrate 2 h in a 2:1 mix of propylene oxide and  
231 Eponate resin (Ted Pella, Redding, CA), then transferred into a 1:1 mix of propylene oxide  
232 and Eponate resin and allowed to infiltrate overnight on a gentle rotator. The following day,  
233 specimens were transferred into a 2:1 mix of Eponate resin and propylene oxide for a  
234 minimum of 2 h, allowed to infiltrate in fresh 100 % Eponate resin for several hours, and  
235 embedded in fresh 100 % Eponate in flat molds; polymerization occurred within 24-48 h at  
236 60 °C. Thin (70 nm) sections were cut using a Leica EM UC7 ultramicrotome, collected onto  
237 formvar-coated grids, stained with uranyl acetate and Reynold's lead citrate and examined in  
238 a JEOL JEM 1011 transmission electron microscope at 80 kV. Images were collected using  
239 an AMT digital imaging system with proprietary image capture software (Advanced  
240 Microscopy Techniques, Danvers, MA).

241

## 242 **Microelectrode array**

243 The Maestro microelectrode array (MEA, Axion BioSystems) platform was used to record  
244 spontaneous activity of the hMOs. A 48-well MEA plate containing a 16-electrode array per  
245 well was precoated with 0.1 mg/ml poly-D-lysine hydrobromide (Sigma-Aldrich). 60-70 days  
246 old organoids of two different passages were briefly treated for 5 min with 1X TrypLE Select  
247 Enzyme, resuspend in 10 µg/ml laminin (Sigma-Aldrich) and placed as a droplet onto the

248 array. After 1 h incubation, neuronal maturation media was added and cells were cultured for  
249 1-2 weeks. Spontaneous activity was recorded at a sampling rate of 12.5 kHz for 5 min at  
250 37 °C over several days. Axion Integrated Studio (AxIS 2.1) was used to assay creation and  
251 analysis. A Butterworth band pass filter with 200-3000 Hz cutoff frequency and a threshold of  
252 6x SD were set to minimise both false-positives and missed detections. The spike raster plots  
253 were analysed using the Neural Metric Tool (Axion BioSystems). Electrodes with an average  
254 of  $\geq 5$  spikes/min were defined as active, for the pharmacological treatment 24 electrodes were  
255 analysed. The organoids were consecutively treated with Gabazine, D-AP-5, NBQX (Cayman  
256 Chemical, end concentration: 50 mM each), and Quinpirole (Sigma Aldrich, end  
257 concentration: 5 $\mu$ M). To block all neuronal activity and thus verify spontaneous spiking  
258 activity of the cells, tetrodotoxin (TTX, Cayman Chemical, 1  $\mu$ M) was applied at the end. The  
259 spike count files generated from the recordings were used to calculate the number of  
260 spikes/active electrode/minute. Further details regarding the MEA system were previously  
261 described (Bardy et al., 2015).

262

### 263 **Statistical analyses**

264 If not stated otherwise, experiments were performed with three independently generated  
265 organoid cultures from three different cell lines (n=9). Gaussian distribution was evaluated by  
266 performing D'Agostino & Pearson omnibus normality test. In case the data were normally  
267 distributed, Grubbs' test was performed to detect significant outliers. Unpaired t-test with  
268 Welch's correction or nonparametric Kolmogorov-Smirnov test were performed to evaluate  
269 statistical significance. Data are presented as mean  $\pm$ SEM. The statistical analyses of scRNA-  
270 seq data are described in the corresponding sections.

271

### 272 **Results**

#### 273 **Characterisation of the neuronal differentiation dynamics in midbrain-specific**

274 **organoids**

275 Previously, we demonstrated that human iPSC-derived midbrain floor plate neural progenitor  
276 cells (mfNPCs) can give rise to 3D human organoids that contain high amounts of  
277 dopaminergic neurons (Smits et al., 2019). To have a better insight into the dynamics of the  
278 neuronal differentiation, we evaluated TUJ1 staining, as a marker for neuronal differentiation,  
279 at two time-points during the differentiation of hMOs (Figure 1A). An in-house developed  
280 image analysis algorithm was used to segment Hoechst positive nuclei and TUJ1 positive  
281 neurons to create specific nuclear and neuronal masks. These masks contain all positive pixel  
282 counts for Hoechst and TUJ1, respectively.

283 The TUJ1 signal normalised to the Hoechst signal significantly increased after 70 days  
284 compared to 35 days, demonstrating a progressive differentiation into post-mitotic neurons.  
285 Whereas, the nuclear marker signal was significantly decreased at 70 days compared to  
286 35 days, which might indicate selection in the cell population, as reported by Suzanne and  
287 Steller (2013) (Figure 1B). Along with these findings, we observed that the size of the  
288 organoids significantly increased during the course of the differentiation. This suggests that the  
289 increased TUJ1 volume and organoid size are due to the increased tissue complexity (e.g.  
290 neuronal arborisation) within the hMO (Figure 1B).

291 To further characterise the neuronal differentiation dynamics at the gene expression level, we  
292 performed scRNA-seq on samples from the two time-points mentioned above. The experiments  
293 were conducted using the Drop-Seq technique (Macosko et al., 2015), and the standard  
294 bioinformatics processing of the data resulted in two sample specific digital expression (DEM)  
295 matrices, which were further normalised and merged (see Methods section).

296 To visualise the so-obtained high-dimensional single-cell data, we performed dimensionality  
297 reduction of the DEM by t-distributed stochastic neighbourhood embedding (t-SNE) (van der  
298 Maarten and Hinton 2008) where each dot corresponds to a cell (Figure 1C). This distribution  
299 shows that cells originating from organoids at 35 days and 70 days only partially cluster

300 together. This underlines that there are remarkable differences in the overall gene expression  
301 between the samples at days 35 and 70. The distribution of the cumulative gene expression  
302 (right panel in Figure 1C) shows that the neuronal gene expression is increased in a large  
303 fraction of the cells suggesting that this fraction of cells may not represent mature neurons.  
304 To determine the differences in neuron-specific cumulative gene expression over time, we  
305 plotted the distributions of cells across the cumulative gene expression scores (Figure 1D).  
306 Here, we used the scores obtained from the lists of precursor cell-specific genes (indicated as  
307 “stemness genes”) and those of neurons. While the distributions of cells across the cumulative  
308 gene expression for precursors is very similar between day 35 and 70 (upper panel), we  
309 observed a significant difference between the distributions of cells across the neuronal  
310 cumulative gene expression (lower panel). Cells at 35 days tend to express the neuron-specific  
311 genes significantly more than cells at 70 days.  
312 To further investigate how the differentiation of precursor cells into neurons evolves over time,  
313 we computed the gene-gene correlation for the genes of the neuron-specific list and of the  
314 stemness-specific list, altogether. Comparing these two lists, we found that at 35 days there are  
315 low values of correlation between genes exclusively specific for neurons or stem cells and also  
316 between neuron- and stemness-specific genes (Figure 1E, left heatmap). Very few of the  
317 correlation values are significantly different from zero and were substituted by zeros in the  
318 upper triangular matrix (Figure 1E, left heatmap). While correlations between stemness genes  
319 and neuron-stemness correlations remain similar at day 70 to day 35, correlations between  
320 neuron-specific genes increased considerably at day 70. This significant increase of neuron-  
321 specific gene correlations indicates a higher commitment of the cells towards the neuronal fate  
322 at day 70 compared to day 35 and supports the finding of a progressive maturation of post-  
323 mitotic neurons (Figure 1E).  
324 Next, we wanted to elucidate which individual genes contribute to the differences between the  
325 gene expression of cells at day 35 and cells at day 70. For this purpose, we performed an

326 analysis of DEGs across the whole transcriptome. From the 24,976 distinct transcripts  
327 measured, 1,311 were significantly differentially expressed between day 35 and 70 (p-  
328 value  $< 0.01$  after Bonferroni correction, which represents approximately 5 % of all genes  
329 expressed (see Supplementary Table 1). When intersecting the list of DEGs with the stemness-  
330 specific genes, we found that approximately 30 % of the stemness-specific genes are DEGs  
331 (see Table 4). Similarly, 42 % (corresponding to 11 genes) of the neuron-specific genes are  
332 differentially expressed (Table 3 and 4). Hence, the percentages of DEGs within the neuron-  
333 specific and stemness-specific lists are remarkably higher than the percentage of DEGs across  
334 the whole transcriptome. These notable changes further indicates the induction of the neuronal  
335 differentiation and progressive maturation.

336 Next, we focused on individual neuron-specific genes and compared their expression over time.  
337 For each gene we computed the log<sub>2</sub> fold-change between the average expression at day 35 and  
338 day 70 (Figure 1F). Consistent with the findings shown in Figure 1D, the majority of genes  
339 were significantly higher expressed at day 35 than at day 70 based on Z-test analysis corrected  
340 for multiple hypotheses testing. Interestingly, among the genes expressed at day 35 we found  
341 genes that are involved in neurogenesis (EBF3 (Garcia-Dominguez et al., 2003)), neuronal  
342 migration and differentiation (L1CAM (Patzke et al., 2016)), whereas genes expressed at day  
343 70 reflect more specific subpopulations of neurons, like GABAergic neurons (DLX1, CALB2  
344 (Al-Jaberi et al., 2015)) in agreement with the separate DEG analysis across the whole  
345 transcriptome (see Table 4).

346

### 347 **Midbrain-specific organoids consist of different neuronal subtypes**

348 From previous studies we know that hMOs are rich in dopaminergic neurons (Jo et al., 2016;  
349 Qian et al., 2016; Monzel et al., 2017; Smits et al., 2019; Kim et al., 2019). We wanted to  
350 further explore which other neuronal subtypes develop besides midbrain dopaminergic neurons

351 within the hMOs.

352 Therefore, we investigated the expression of genes typical for dopaminergic, glutamatergic,  
353 GABAergic, and serotonergic neurons by analysing the scRNA-seq data. We plotted the  
354 distributions of cells across the cumulative gene expression scores, which were obtained from  
355 the lists of genes specific of a neuronal subtype (Figure 2A). While the cell distribution over  
356 cumulative expression score for GABAergic neurons was very similar between the samples at  
357 35 days and 70 days (Figure 2A, third panel), we detected statistically significant differences  
358 between the distributions of cells over scores for the other three types of neurons. The  
359 expression of the selected genes for the glutamatergic and dopaminergic neurons was increased  
360 at day 35 compared to day 70, which is consistent with the observations for the neuron specific  
361 score (Figure 1D). Interestingly, we discovered that the vast majority, approximately more than  
362 700 of the 1000 cells, lacks completely expression of genes specific for serotonergic neurons  
363 (Figure 2C, fourth panel). Thus, we disregarded this neuronal subtype in the subsequent  
364 analyses and focused next on individual genes specific of dopaminergic, glutamatergic, and  
365 GABAergic neurons, by computing the log<sub>2</sub> fold-change between the average gene expression  
366 at day 35 and at day 70 (Figure 2B-D). In each of the three lists, the majority of the genes for  
367 which a statistically significant difference is present are actually more expressed at 35 days  
368 than at 70 days, consistently with the findings of Figure 2A.

369 When intersecting the list of 1,311 DEGs across the whole transcriptome with the lists of  
370 dopaminergic, glutamatergic and GABAergic neurons, we found that 42 %, 34 %, and 17 % of  
371 the genes were DEGs within these lists, respectively (see Supplementary Table 1 and Table 4).  
372 Again, all of these percentages are considerably higher than the 5 % of DEGs across the whole  
373 transcriptome indicating that neuronal subtypes specific genes, in particular dopaminergic and  
374 glutamatergic, are highly represented within DEGs during hMO development.

375 Lastly, to verify the presence of the addressed neuronal subtypes we conducted an  
376 immunohistochemistry staining for the respective neurotransmitters. This allowed us to

377 robustly detect dopaminergic, glutamatergic and GABAergic neurons as well as even a few  
378 serotonergic neurons within hMOs (Figure 2E).

379

380

### 381 **Midbrain-specific organoids express synaptic proteins**

382 After identifying the presence of neurons and even specific neuronal subtypes on transcriptome  
383 expression levels by means of neurotransmitter staining and scRNA-seq, we investigated the  
384 actual interaction among the neuronal cells within the hMOs. We previously showed that hMOs  
385 synthesise and release the neurotransmitter dopamine (Smits et al., 2019). This already suggests  
386 the establishment of a functional neuronal network. The basic requirement for neuronal  
387 network formation is the development of synapses. Hence, we evaluated the presence of  
388 synaptic connections using the presynaptic marker SYNAPTOPHYSIN and the postsynaptic  
389 marker PSD95 in organoid sections after 70 days of culture (Figure 3A). Both proteins were  
390 detectable in a puncta-like organisation, which is expected for synapses. With a subsequent 3D  
391 surface reconstruction, we observed that the signals for SYNAPTOPHYSIN and PSD95 were  
392 localised in close proximity, forming pre- and postsynaptic puncta (Figure 3B). To further  
393 investigate whether actual functional synaptic connections were formed in the hMOs, we used a  
394 transmission electron microscopy (TEM) approach (Figure 3C). EM micrographs show  
395 excitatory synapses characterised by electron dense post-synaptic density proteins (full arrow)  
396 and pre-synaptic synapse (asterisks) loaded with synaptic vesicles.

397

### 398 **Midbrain-specific organoids develop GABAergic, glutamatergic and dopaminergic** 399 **electrophysiological activity**

400



401 Non-invasive multielectrode array (MEA) measurements can give insights into physiological  
402 properties, like the generation of spontaneous neuronal activity of *in vitro* cultured, self-  
403 organised networks (Luhmann et al., 2016). As the assessment of neuronal activity is  
404 important to evaluate the functional maturation, we tested the spontaneous  
405 electrophysiological activity of hMOs by MEA measurements (Odawara et al., 2016). We  
406 measured extracellular field potentials, which are generated by action potentials. At days 50-  
407 60 of differentiation, hMOs were seeded in 48-well tissue culture MEA plates on a grid of 16  
408 electrodes (Figure 4A and B). After 10-20 days of culturing, we recorded spontaneous  
409 activity, on several electrodes, over several days, in the form of mono- and biphasic spikes  
410 (Figure 4Aii). To investigate which neuronal subtypes were functionally active in the hMOs,  
411 we applied specific drugs following a previously reported experimental design (Illes et al.,  
412 2014). We recorded spiking patterns from 24 active electrodes: in Figure 4C and D  
413 representative recordings of one electrode are displayed. After treating the organoids with  
414 gabazine, a GABA<sub>A</sub> receptor antagonist, we detected an increase of spontaneous spiking  
415 (22.5 % increase, Figure 4Dii). Following the gabazine-induced disinhibition, we applied the  
416 AMPA/Kainate-receptor antagonist NBQX and the NMDA-receptor antagonist D-AP-5. The  
417 inhibition of the excitatory neurons resulted in a 28.1 % decrease of spontaneous activity  
418 (Figure 4Diii). After the inhibition of GABAergic and glutamatergic neurons in the hMOs, we  
419 added the D2/D3 receptor agonist quinpirole (Figure 4C and Div), which resulted in a 47.8 %  
420 decrease of neuronal activity. Confirming the findings displayed in Figure 2, we conclude  
421 from these experiments that hMOs contain functional GABAergic, glutamatergic and  
422 dopaminergic neurons.

423

424

## 425 **Discussion**

426 The *in vitro* human brain organoid technology has become a valuable tool allowing advances in

427 the field of basic research as well as in translational applications (Fatehullah et al., 2016).  
428 Organoids specifically modelling the human midbrain hold great promise for studying human  
429 development and for modelling Parkinson's disease (PD) (Jo et al., 2016; Monzel et al., 2017;  
430 Kim et al., 2019; Smits et al., 2019). In contrast to 2D monolayer cultures, hMOs can  
431 recapitulate complex interactions of midbrain dopaminergic neurons with other cell types of the  
432 central nervous system (CNS) in a 3D environment. However, human midbrain brain organoid  
433 research has so far focused mainly on dopaminergic neurons. In a detailed study of Borroto-  
434 Escuela et al. (2018) it has been described that released dopamine can diffuse into synaptic  
435 regions of glutamate and GABA synapses and directly affect other striatal cell types possessing  
436 dopamine receptors. Furthermore, *substantia nigra* dopaminergic neurons are directly  
437 controlled by GABAergic input (Tepper and Lee, 2007). Evidences from these studies suggest  
438 that the presence of other neuronal subtypes is important to model multifactorial disease like  
439 PD. In our study, we have demonstrated that the derivation of hMOs leads to functional  
440 neuronal networks, containing different neuronal subtypes of the human midbrain. Single-cell  
441 transcriptomic data from hMOs demonstrated that there is an increased expression of neuronal-  
442 specific genes in 35 days compared to 70 days old hMOs. On the other hand, the gene-gene  
443 correlations between only neuron-specific genes increased considerably at day 70, suggesting  
444 an increased commitment of cells towards the neuronal cell fate during the course of the  
445 organoid development. This further supports the finding of a progressive maturation of post-  
446 mitotic neurons (Figure 1D and E). The identification of these neuron-specific genes revealed  
447 that the genes upregulated at the earlier time point are relevant in the process of neurogenesis  
448 and neuronal migration and differentiation (EBF3 (Garcia-Dominguez et al., 2003), L1CAM  
449 (Patzke et al., 2016)). Whereas the upregulated genes at the later time point have been for  
450 instance implicated in subpopulations like GABAergic neurons (DLX1, CALB2 (Al-Jaberi et  
451 al., 2015)). (Figure 1F). This indicates a higher commitment of the cells toward their intended  
452 fate and a progressive maturation of the post-mitotic neurons within the hMOs. Furthermore,

453 single-cell analysis of the hMOs also proved the presence of specific neuronal subtypes, like  
454 dopaminergic, glutamatergic and GABAergic neurons. While the scRNA-seq data were not  
455 fully conclusive concerning serotonergic neurons, a staining approach allowed to detect at least  
456 some of these neurons (Figure 2). Supporting the findings of currently published midbrain-  
457 specific organoid models (Jo et al., 2016; Qian et al., 2016; Monzel et al., 2017; Smits et al.,  
458 2019), we detected a significant upregulation of tyrosine hydroxylase (TH) within the cell  
459 population of 70 days old hMOs compared to 35 days old hMOs. The activity of neurons and  
460 their different receptors can be analysed by the specific response to chemical compounds. It has  
461 been shown that quinpirole, a specific D2/D3 receptor agonist, suppresses the firing in hMOs  
462 (Jo et al., 2016; Monzel et al., 2017). In addition to the previously reported analyses in hMOs,  
463 we blocked inhibitory and excitatory communication, to further isolate and attribute the  
464 recorded signals to neuronal subtypes. Gabazine induces a disinhibition of GABAergic  
465 neurons, whereas NMDA-receptor and AMPA/Kainate-receptor antagonists inhibit  
466 glutamatergic excitatory communication (Illes et al., 2014). Together with the characteristic  
467 hallmarks of synapse formation (Figure 3A-C) and the previous findings of dopamine release  
468 (Smits et al., 2019), these data confirm the presence of functional dopamine receptors in  
469 dopaminergic neurons as well as functional GABAergic and glutamatergic neurons within  
470 hMOs. As neurons do not exist in isolation in the CNS but form functional networks with other  
471 neurons and non-neuronal cells, it is important to expand our research of neurodegenerative  
472 diseases using 3D models that are able to recapitulate cell autonomous as well as non-cell  
473 autonomous aspects. Utilising 3D cell culture models that comprise a variety of neuronal  
474 subtypes could lead to new insights into the selective vulnerabilities, which are observed in  
475 neurodegeneration. Indeed, evidence suggests that specific regulation of the excitability of  
476 dopaminergic neurons by other neuronal subtypes in the midbrain might explain their selective  
477 vulnerability in PD (Korotkova et al., 2004). This underlines the importance and the enormous  
478 potential for future disease modelling of the here described hMO model, as it contains

479 functionally connected heterogeneous neuronal cell populations.

480

481

## 482 **Acknowledgments**

483

484 We would like to thank Dr. Sebastian Illes (University of Gothenburg, Sweden) for his help  
485 with the experimental MEA design and Diane Capen (Massachusetts General Hospital,  
486 Boston, USA) for her EM work. We thank Dr. Jared Sternecker (Technical University of  
487 Dresden, Germany) and Dr. Bill Skarnes (The Wellcome Trust Sanger Institute, Cambridge,  
488 UK) for human iPSC lines. Furthermore, we would like to thank Yohan Jarosz from the  
489 LCSB Bioinformatics Core Group for his support in data management. This project was  
490 supported by the LCSB pluripotent stem cell core facility. The JCS lab is supported by the  
491 Fonds National de la Recherche (FNR) (CORE, C13/BM/5791363 and Proof-of-Concept  
492 program PoC15/11180855 & PoC16/11559169). This is an EU Joint Programme-  
493 Neurodegenerative Disease Research (JPND) project (INTER/JPND/14/02;  
494 INTER/JPND/15/11092422). Further support comes from the SysMedPD project which has  
495 received funding from the European Union's Horizon 2020 research and innovation  
496 programme under grant agreement No 668738. LMS is supported by fellowships from the  
497 FNR (AFR, Aides à la Formation-Recherche). Electron microscopy was performed in the  
498 Microscopy Core of the Center for Systems Biology/Program in Membrane Biology, which is  
499 partially supported by an Inflammatory Bowel Disease Grant DK043351 and a Boston Area  
500 Diabetes and Endocrinology Research Center (BADERC) Award DK057521. SM is  
501 supported by the University of Luxembourg and the National Research Fund through the  
502 CriTiCS DTU FNR PRIDE/10907093/CRITICS. KG and AS were supported by the  
503 Luxembourg National Research Fund (FNR) through the C14/BM/7975668/CaSCAD project

504 and AS additionally by the National Biomedical Computation Resource (NBCR) through the  
505 NIH P41 GM103426 grant from the National Institutes of Health.

506

### 507 **Author Contributions**

508 LMS designed and performed cell culture and imaging experiments, prepared the figures and  
509 wrote the original draft. KG performed the scRNA-seq experiments and related bioinformatics  
510 approaches. SM performed the computational analysis of the single-cell RNA-Seq data, edited  
511 the manuscript and contributed to the figures. PMAA contributed to the development of 3D  
512 image analysis. RK supervised image analysis design. AS supervised the design and  
513 implementation of the single-cell experiments and associated computational data analysis. SB  
514 initiated the project, supervised it and edited the manuscript. JCS conceived and supervised the  
515 project, designed the experiments and edited the manuscript.

516

### 517 **Competing financial interests**

518 We declare no competing interests.

519

### 520 **Data Availability**

521 The data that support the findings of this study are public available at this doi:  
522 [www.doi.org/10.17881/lcsb.20190326.01](http://www.doi.org/10.17881/lcsb.20190326.01).

523

524

### 525 **References**

526

527 Abe-Fukasawa, N., Otsuka, K., Aihara, A., Itasaki, N., and Nishino, T. (2018). Novel 3D  
528 Liquid Cell Culture Method for Anchorage-independent Cell Growth, Cell Imaging and  
529 Automated Drug Screening. *Sci Rep* 8(1), 3627. doi: 10.1038/s41598-018-21950-5.

- 530 Al-Jaberi, N., Lindsay, S., Sarma, S., Bayatti, N., and Clowry, G.J. (2015). The early fetal  
531 development of human neocortical GABAergic interneurons. *Cereb Cortex* 25(3), 631-  
532 645. doi: 10.1093/cercor/bht254.
- 533 Bardy, C., van den Hurk, M., Eames, T., Marchand, C., Hernandez, R.V., Kellogg, M., et al.  
534 (2015). Neuronal medium that supports basic synaptic functions and activity of human  
535 neurons in vitro. *Proceedings of the National Academy of Sciences*, 201504393. doi:  
536 10.1073/pnas.1504393112.
- 537 Borroto-Escuela, D.O., Perez De La Mora, M., Manger, P., Narvaez, M., Beggiato, S.,  
538 Crespo-Ramirez, M., et al. (2018). Brain Dopamine Transmission in Health and  
539 Parkinson's Disease: Modulation of Synaptic Transmission and Plasticity Through  
540 Volume Transmission and Dopamine Heteroreceptors. *Front Synaptic Neurosci* 10, 20.  
541 doi: 10.3389/fnsyn.2018.00020.
- 542 Cho, G.S., Lee, D.I., Tampakakis, E., Murphy, S., Andersen, P., Uosaki, H., et al. (2017).  
543 Neonatal Transplantation Confers Maturation of PSC-Derived Cardiomyocytes Conducive  
544 to Modeling Cardiomyopathy. *Cell Rep* 18(2), 571-582. doi:  
545 10.1016/j.celrep.2016.12.040.
- 546 Cooper, O., Seo, H., Andrabi, S., Guardia-Laguarta, C., Graziotto, J., Sundberg, M., et al.  
547 (2012). Pharmacological rescue of mitochondrial deficits in iPSC-derived neural cells  
548 from patients with familial Parkinson's disease. *Sci Transl Med* 4(141), 141ra190. doi:  
549 10.1126/scitranslmed.3003985.
- 550 Di Lullo, E., and Kriegstein, A.R. (2017). The use of brain organoids to investigate neural  
551 development and disease. *Nat Rev Neurosci* 18(10), 573-584. doi: 10.1038/nrn.2017.107.
- 552 Fatehullah, A., Tan, S.H., and Barker, N. (2016). Organoids as an in vitro model of human  
553 development and disease. *Nature Publishing Group* 18, 246-254. doi: 10.1038/ncb3312.
- 554 Garcia-Dominguez, M., Poquet, C., Garel, S., and Charnay, P. (2003). Ebf gene function is  
555 required for coupling neuronal differentiation and cell cycle exit. *Development* 130(24),  
556 6013-6025. doi: 10.1242/dev.00840.
- 557 Illes, S., Jakab, M., Beyer, F., Gelfert, R., Couillard-Despres, S., Schnitzler, A., et al. (2014).  
558 Intrinsically active and pacemaker neurons in pluripotent stem cell-derived neuronal  
559 populations. *Stem Cell Reports* 2(3), 323-336. doi: 10.1016/j.stemcr.2014.01.006.
- 560 Jo, J., Xiao, Y., Sun, A.X., Cukuroglu, E., Tran, H.D., Goke, J., et al. (2016). Midbrain-like  
561 Organoids from Human Pluripotent Stem Cells Contain Functional Dopaminergic and  
562 Neuromelanin-Producing Neurons. *Cell Stem Cell* 19(2), 248-257. doi:  
563 10.1016/j.stem.2016.07.005.

- 564 Kelava, I., and Lancaster, M.A. (2016). Dishing out mini-brains : Current progress and future  
565 prospects in brain organoid research. *Developmental Biology* 420, 199-209. doi:  
566 10.1016/j.ydbio.2016.06.037.
- 567 Kim, H., Park, H.J., Choi, H., Chang, Y., Park, H., Shin, J., et al. (2019). Modeling G2019S-  
568 LRRK2 Sporadic Parkinson's Disease in 3D Midbrain Organoids. *Stem Cell Reports*  
569 12(3), 518-531. doi: 10.1016/j.stemcr.2019.01.020.
- 570 Korotkova, T.M., Ponomarenko, A.A., Brown, R.E., and Haas, H.L. (2004). Functional  
571 diversity of ventral midbrain dopamine and GABAergic neurons. *Mol Neurobiol* 29(3),  
572 243-259. doi: 10.1385/MN:29:3:243.
- 573 La Manno, G., Gyllborg, D., Codeluppi, S., Nishimura, K., Salto, C., Zeisel, A., et al. (2016).  
574 Molecular Diversity of Midbrain Development in Mouse, Human, and Stem Cells. *Cell*  
575 167(2), 566-580.e519. doi: 10.1016/j.cell.2016.09.027.
- 576 Lancaster, M.A., Renner, M., Martin, C.A., Wenzel, D., Bicknell, L.S., Hurles, M.E., et al.  
577 (2013). Cerebral organoids model human brain development and microcephaly. *Nature*  
578 501(7467), 373-379. doi: 10.1038/nature12517.
- 579 Luhmann, H.J., Sinning, A., Yang, J.W., Reyes-Puerta, V., Stuttgart, M.C., Kirischuk, S., et  
580 al. (2016). Spontaneous Neuronal Activity in Developing Neocortical Networks: From  
581 Single Cells to Large-Scale Interactions. *Front Neural Circuits* 10, 40. doi:  
582 10.3389/fncir.2016.00040.
- 583 Macosko, E.Z., Basu, A., Satija, R., Nemes, J., Shekhar, K., Goldman, M., et al. (2015).  
584 Highly Parallel Genome-wide Expression Profiling of Individual Cells Using Nanoliter  
585 Droplets. *Cell* 161(5), 1202-1214. doi: 10.1016/j.cell.2015.05.002.
- 586 Matsui, T.K., Matsubayashi, M., Sakaguchi, Y.M., Hayashi, R.K., Zheng, C., Sugie, K., et al.  
587 (2018). Six-month cultured cerebral organoids from human ES cells contain matured  
588 neural cells. *Neurosci Lett* 670, 75-82. doi: 10.1016/j.neulet.2018.01.040.
- 589 Ming, G.L., Tang, H., and Song, H. (2016). Advances in Zika Virus Research: Stem Cell  
590 Models, Challenges, and Opportunities. *Cell Stem Cell* 19(6), 690-702. doi:  
591 10.1016/j.stem.2016.11.014.
- 592 Monzel, A.S., Smits, L.M., Hemmer, K., Hachi, S., Moreno, E.L., van Wuellem, T., et al.  
593 (2017). Derivation of Human Midbrain-Specific Organoids from Neuroepithelial Stem  
594 Cells. *Stem Cell Reports* 8(5), 1144-1154. doi: 10.1016/j.stemcr.2017.03.010.
- 595 Muguruma, K., Nishiyama, A., Kawakami, H., Hashimoto, K., and Sasai, Y. (2015). Self-  
596 Organization of Polarized Cerebellar Tissue in 3D Culture of Human Pluripotent Stem  
597 Cells. *Cell Reports* 10, 537-550. doi: 10.1016/j.celrep.2014.12.051.

- 598 Nguyen, H.N., Byers, B., Cord, B., Shcheglovitov, A., Byrne, J., Gujar, P., et al. (2011).  
599 LRRK2 mutant iPSC-derived DA neurons demonstrate increased susceptibility to  
600 oxidative stress. *Cell stem cell* 8, 267-280. doi: 10.1016/j.stem.2011.01.013.
- 601 Odawara, A., Katoh, H., Matsuda, N., and Suzuki, I. (2016). Physiological maturation and  
602 drug responses of human induced pluripotent stem cell-derived cortical neuronal networks  
603 in long-term culture. *Sci Rep* 6, 26181. doi: 10.1038/srep26181.
- 604 Patzke, C., Acuna, C., Giam, L.R., Wernig, M., and Sudhof, T.C. (2016). Conditional deletion  
605 of L1CAM in human neurons impairs both axonal and dendritic arborization and action  
606 potential generation. *J Exp Med* 213(4), 499-515. doi: 10.1084/jem.20150951.
- 607 Qian, X., Nguyen, H.N., Jacob, F., Song, H., and Ming, G.L. (2017). Using brain organoids to  
608 understand Zika virus-induced microcephaly. *Development* 144(6), 952-957. doi:  
609 10.1242/dev.140707.
- 610 Qian, X., Nguyen, H.N., Song, M.M., Hadiono, C., Ogden, S.C., Hammack, C., et al. (2016).  
611 Brain-Region-Specific Organoids Using Mini-bioreactors for Modeling ZIKV Exposure.  
612 *Cell* 165(5), 1238-1254. doi: 10.1016/j.cell.2016.04.032.
- 613 Quadrato, G., Nguyen, T., Macosko, E.Z., Sherwood, J.L., Min Yang, S., Berger, D.R., et al.  
614 (2017). Cell diversity and network dynamics in photosensitive human brain organoids.  
615 *Nature* 545(7652), 48-53. doi: 10.1038/nature22047.
- 616 Reinhardt, P., Glatza, M., Hemmer, K., Tsytsyura, Y., Thiel, C.S., Hoing, S., et al. (2013a).  
617 Derivation and expansion using only small molecules of human neural progenitors for  
618 neurodegenerative disease modeling. *PLoS One* 8(3), e59252. doi:  
619 10.1371/journal.pone.0059252.
- 620 Reinhardt, P., Schmid, B., Burbulla, L.F., Schondorf, D.C., Wagner, L., Glatza, M., et al.  
621 (2013b). Genetic correction of a LRRK2 mutation in human iPSCs links parkinsonian  
622 neurodegeneration to ERK-dependent changes in gene expression. *Cell Stem Cell* 12(3),  
623 354-367. doi: 10.1016/j.stem.2013.01.008.
- 624 Ryan, Scott D., Dolatabadi, N., Chan, Shing F., Zhang, X., Akhtar, Mohd W., Parker, J., et al.  
625 (2013). Isogenic Human iPSC Parkinson's Model Shows Nitrosative Stress-Induced  
626 Dysfunction in MEF2-PGC1 $\alpha$  Transcription. *Cell* 155, 1351-1364. doi:  
627 10.1016/j.cell.2013.11.009.
- 628 Sánchez-Danés, A., Richaud-Patin, Y., Carballo-Carbajal, I., Jiménez-Delgado, S., Caig, C.,  
629 Mora, S., et al. (2012). Disease-specific phenotypes in dopamine neurons from human  
630 iPS-based models of genetic and sporadic Parkinson's disease. *EMBO molecular medicine*  
631 4, 380-395. doi: 10.1002/emmm.201200215.



- 632 Smits, L.M., Reinhardt, L., Reinhardt, P., Glatza, M., Monzel, A.S., Stanslowsky, N., et al.  
633 (2019). Modeling Parkinson's disease in midbrain-like organoids. *npj Parkinson's Disease*  
634 in press. doi: 10.1038/s41531-019-0078-4
- 635 Suzanne, M., and Steller, H. (2013). Shaping organisms with apoptosis. *Cell Death Differ*  
636 20(5), 669-675. doi: 10.1038/cdd.2013.11.
- 637 Takahashi, K., and Yamanaka, S. (2006). Induction of pluripotent stem cells from mouse  
638 embryonic and adult fibroblast cultures by defined factors. *Cell* 126(4), 663-676. doi:  
639 10.1016/j.cell.2006.07.024.
- 640 Tepper, J.M., and Lee, C.R. (2007). GABAergic control of substantia nigra dopaminergic  
641 neurons. *Prog Brain Res* 160, 189-208. doi: 10.1016/S0079-6123(06)60011-3.
- 642 Tieng, V., Stoppini, L., Villy, S., Fathi, M., Dubois-Dauphin, M., and Krause, K.H. (2014).  
643 Engineering of midbrain organoids containing long-lived dopaminergic neurons. *Stem*  
644 *Cells Dev* 23(13), 1535-1547. doi: 10.1089/scd.2013.0442.
- 645 van der Maarten, L., and Hinton, G. (2008). "Visualizing Data using t-SNE", in: *Journal of*  
646 *Machine Learning Research*).
- 647 Walter, J. (2019). Neural stem cells of Parkinson's disease patients exhibit aberrant  
648 mitochondrial morphology and functionality. *Stem Cell Reports* in press.
- 649

650 **Tables**

651 **Table 1**

| cell lines | Derivation conditions | Gender | Age at sampling | Genotype | Source                                         | hiPSC ID     | Figure                |
|------------|-----------------------|--------|-----------------|----------|------------------------------------------------|--------------|-----------------------|
| <b>H1</b>  | 3D                    | Female | 81              | WT       | Reinhardt <i>et al.</i> , 2013                 | 2.0.0.10.1.0 | 1A, B C, 2A, B, C     |
| <b>H2</b>  | 3D                    | Male   | n.a             | WT       | Alstem (iPS15)                                 | 2.0.0.33.0.0 | 1A, B C, 2A, B, C     |
| <b>H3</b>  | 3D                    | Female | n.a.            | WT       | Wellcome Trust Sanger Institute (Bill Skarnes) | 2.0.0.19.0.0 | 1A, B C, 2A, B, C, 3A |
| <b>H4</b>  | 3D                    | Female | cord blood      | WT       | Gibco (A13777)                                 | 2.0.0.15.0.0 | 3A, B, C, D           |

652 **Table 1: Cell lines used in this study to generate mfNPCs and midbrain-specific**  
 653 **organoids.** Human mfNPCs were derived under 2D conditions from human iPSCs of  
 654 different origin. hMOs were generated as described in the experimental procedures section.  
 655

656 **Table 2**

| Antibody           | Species | Source     | Ref.-No.      | Dilution |
|--------------------|---------|------------|---------------|----------|
| <b>Dopamine</b>    | rabbit  | ImmuSmol   | IS1005        | 1:500    |
| <b>GABA</b>        | chicken | ImmuSmol   | IS1036        | 1:500    |
| <b>L-Glutamate</b> | rabbit  | ImmuSmol   | IS018         | 1:500    |
| <b>MAP2</b>        | mouse   | Millipore  | MAB3418       | 1:1000   |
| <b>PSD-95</b>      | rabbit  | Invitrogen | 51-6900       | 1:300    |
| <b>SYP</b>         | mouse   | Abcam      | ab8049        | 1:50     |
| <b>TUJ1</b>        | mouse   | BioLegend  | 801201        | 1:600    |
| <b>TUJ1</b>        | rabbit  | Covance    | PRB-435P-0100 | 1:600    |
| <b>TUJ1</b>        | chicken | Millipore  | AB9354        | 1:600    |

657 **Table 2: Antibodies used in this study.**

658

659 **Table 3**

| Stemness | Neuronal     | Dopaminergic   | Glutamatergic | GABAergic        | Serotonergic |
|----------|--------------|----------------|---------------|------------------|--------------|
| SOX2     | BCL11A       | NR4A2          | SLC1A1        | GAD1             | SLC6A4       |
| PAX6     | CACNA2D2     | PBX1           | SLC1A2        | GAD2             | SLC18A2      |
| HES5     | CALB2        | GRIA3          | SLC1A3        | GABARAP          | <i>TPH1</i>  |
| ASCL1    | <i>CD274</i> | TH             | SLC17A6       | GABARAPL1        | TPH2         |
| SOX1     | CELF4        | EN1            | SLC17A7       | GABARAPL2        | FEV          |
| PAX3     | CLSTN2       | TMCC3          | GLS           | <i>GABARAPL3</i> | HTR1D        |
| DACH1    | DLX1         | NTM            | GLS2          | ABAT             | HTR1DP1      |
| LMO3     | DPYSL5       | DDC            | GRIN1         |                  | HTR1E        |
| NR2F1    | DYNC1I1      | CAMK2N1        | GRIN2A        |                  | HTR1F        |
| PLAGL1   | EBF3         | <i>ALDH1A1</i> | GRIN2B        |                  | HTR2A        |
| LIX1     | FOSL2        | APP            | GRIN2C        |                  | HTR2A-AS1    |
| HOXA2    | ISLR2        | PDZRN4         | GRIN2D        |                  | HTR2B        |
| FOXA2    | L1CAM        | PCDH10         | <i>GRIN3A</i> |                  | HTR2C        |
| IRX3     | <i>MEG3</i>  | <i>MEG3</i>    | GRIN3B        |                  | HTR3A        |

|            |              |       |               |
|------------|--------------|-------|---------------|
| NHLH2      | ERBB4        | GRINA | HTR3B         |
| NPAS4      | SLC10A4      | GRIA1 | HTR3D         |
| <i>NPY</i> | BEX5         | GRIA2 | HTR4          |
| NXPH4      | FOXA2        | GRIA3 | HTR5A         |
| RELN       | <i>NPY1R</i> | GRIA4 | HTR5A-AS1     |
| RGMB       | GPC2         |       | <i>HTR5BP</i> |
| SLC17A6    | KCNJ6        |       | HTR7P1        |
| SLC32A1    | LMX1B        |       | HTRA1         |
| SST        |              |       | HTRA2         |
| STMN2      |              |       | HTRA3         |
| SYNGR3     |              |       | HTRA4         |
| SYT4       |              |       |               |
| TMEM130    |              |       |               |
| VGF        |              |       |               |
| VSTM2L     |              |       |               |

660 **Table 3: Gene lists used in this study.** Genes that were not detected in the transcriptome are  
 661 emphasised in italics.  
 662

663

**Table 4**

| Stemness | Neuronal | Dopaminergic | Glutamatergic | GABAergic | Serotonergic |
|----------|----------|--------------|---------------|-----------|--------------|
| ASCL1    | CALB2    | APP          | GRIA2         | GAD2      | HTRA1        |
| FOXA2    | CELF4    | EN1          | GRIN2A        |           | SLC18A24     |
| LMO3     | CLSTN2   | FOXA2        | GRIN2B        |           |              |
| SOX2     | DLX1     | GPC2         | SLC17A6       |           |              |
|          | DPYSL5   | NTM          | SLC1A2        |           |              |
|          | EBF3     | PCDH10       | SLC1A3        |           |              |
|          | FOSL2    | PDZRN4       |               |           |              |
|          | SLC17A6  | TH           |               |           |              |
|          | SST      |              |               |           |              |
|          | STMN2    |              |               |           |              |
|          | VSTM2L   |              |               |           |              |

664 **Table 4: List of differentially expressed genes.**  
 665

666

667

668

669

### Figure legends

670

671 **Figure 1: Identification of neuronal population in midbrain-specific organoids.** (A)

672 Immunohistological staining of TUJ1 expressing neurons in 35 d organoid sections (50  $\mu$ m

673 thickness, scale bar 100  $\mu$ m). (B) The ratio of TUJ1 positive pixels normalised against Hoechst

674 (35 d n=59, 70 d n=48). Quantification of Hoechst positive pixel (35 d n=22, 70 d n=29).

675 Average size of four different organoid lines. Whiskers present minimum and maximum (35 d

676 n=21, 70 d n=44). Data presented as mean  $\pm$ SEM. (C) Dimensionality reduction of the scRNA-

677 seq data by tSNE underlies differences in gene expression between the samples at day 35 and  
678 day 70. Each dot corresponds to a cell. In the left panel, colours are used to indicate cells from  
679 the two time points. In the right panel, the colour scale indicates the score (cumulative gene  
680 expression) corresponding to neuron-specific genes for each cell. (D) Distributions  
681 (histograms) of cells across the cumulative gene expression scores, obtained from lists of genes  
682 specific for precursor cells (stemness genes) or neurons (stemness genes). (E) Gene-gene  
683 correlation matrices, for genes at day 35 on the left, and day 70 on the right. (F) Log<sub>2</sub> fold-  
684 changes between day 35 and day 70 in gene expression for individual genes corresponding to  
685 the lists for neuron-specific genes.

686

687 **Figure 2: Neuronal subtypes in midbrain-specific organoids.** (A) Distributions (histograms)  
688 of cells across the cumulative gene expression scores, obtained from the lists of genes specific  
689 for the main neuronal subtypes present in the organoids, namely dopaminergic, glutamatergic,  
690 GABAergic, and serotonergic neurons. (B-D) Log<sub>2</sub> fold-changes between day 35 and day 70 in  
691 gene expression for individual genes corresponding to the lists of genes typical of the neuronal  
692 subtypes: (B) dopaminergic neurons, (C) glutamatergic neurons, and (D) GABAergic neurons.  
693 (E) Immunohistological staining of 70 d organoid sections (50  $\mu$ m thickness). Detection of the  
694 neurotransmitters dopamine, L-glutamine, GABA, and serotonin. Scale bar is 20  $\mu$ m.

695

696 **Figure 3: Midbrain-specific organoids express synaptic proteins.** (A) Immunostaining of  
697 pre- and the postsynaptic markers at day 70. Dashed lines indicate the region of magnification.  
698 Scale bar is 50  $\mu$ m. (B) 3D surface reconstructions of confocal z-stacks of an organoid at day  
699 70 of differentiation. Scale bar is 10  $\mu$ m. (C) Representative electron micrographs of synaptic  
700 terminals from 63 d organoids. Scale bar is 500 nm.

701

702 **Figure 4: Electrophysiological activity in midbrain-specific organoids.** (A) Representative  
703 scheme of positioned midbrain organoid on a 16-electrode array in a 48-well tissue culture  
704 plate (i). Examples of mono- and biphasic spikes detected by individual electrodes of a  
705 multielectrode array (MEA) system (ii). (B) Representative image of midbrain organoid  
706 positioned on a 16-electrode array in a 48-well tissue culture plate. Scale bar is 350  $\mu\text{m}$ . (C-D)  
707 Evaluation of the spontaneous activity by addressing inhibitory (blue) and excitatory (green)  
708 neurotransmitter receptors using multielectrode array (MEA) system. (C) Representative raw  
709 data traces show the effect of Quinpirole in absence of inhibitory and excitatory synaptic  
710 communication. (D) Representative spike raster plots demonstrate effects of applied  
711 compounds.

712

**Figure 1** Identification of neuronal population in midbrain-specific organoids.

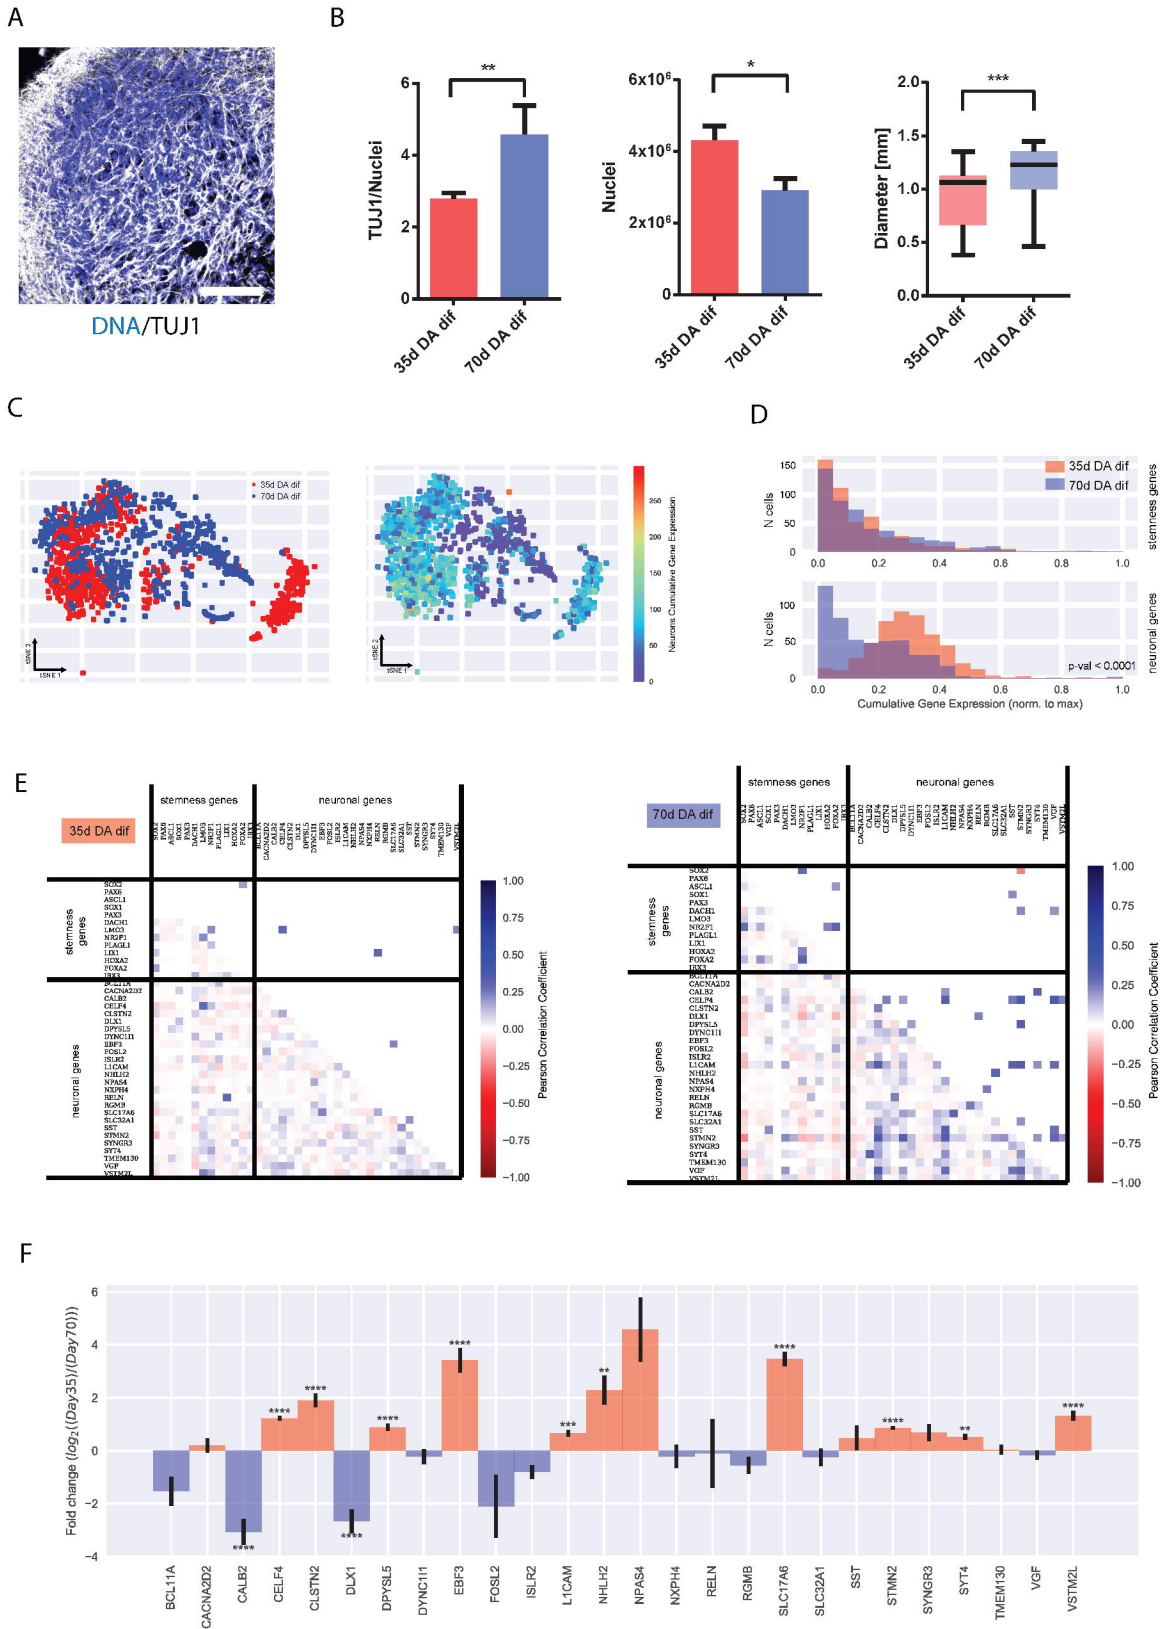

**Figure 2** Neuronal subpopulation in midbrain-specific organoids.

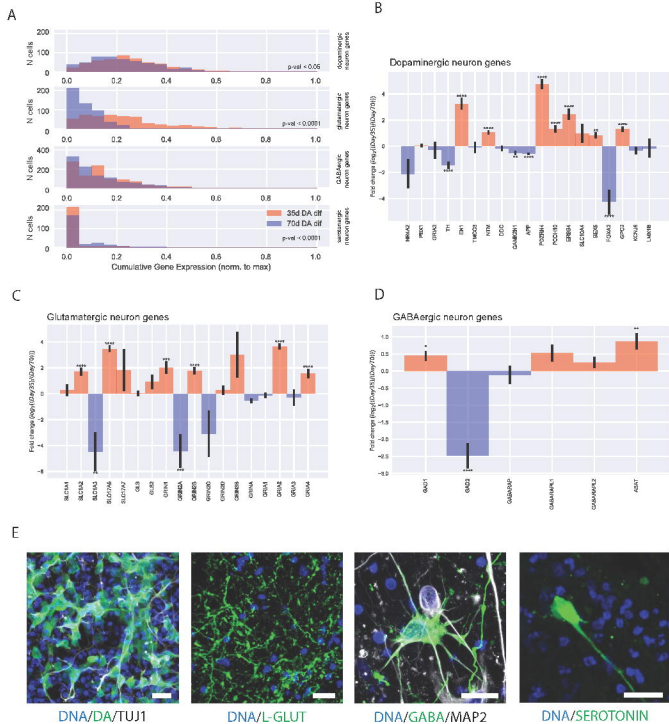

Figure 3 Midbrain-specific organoids express synaptic proteins.

A

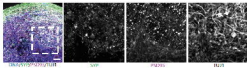

B

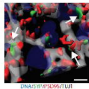

C

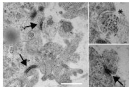

Source: https://www.biorxiv.org/content/10.1101/589598v1.full.pdf
